# Supplementary material
Source: Royal Society of Chemistry journal article supplement (doi:10.1039/d6ce00061d)
Supplement: d6ce00061d1.pdf [file d6ce00061d1.pdf]

# Electronic Supplementary Information

## GQD-Assisted MnO<sub>6</sub> Octahedra Engineering in CuMnO<sub>2</sub> for High Performance Coin-Cell Supercapacitor

Raushan Kabir<sup>1,2</sup>, Sudipta Goswami<sup>1</sup>, Dipten Bhattacharya<sup>3</sup>, Saikat Kumar Seth<sup>2</sup>, Chandan Kumar Ghosh<sup>1,\*</sup>

<sup>1</sup>School of Materials Science and Nanotechnology, Jadavpur University, Jadavpur, Kolkata 700032, India

<sup>2</sup>Department of Physics, Jadavpur University, Jadavpur, Kolkata 700032, India

<sup>3</sup>Advanced Mechanical and Materials Characterization Division, CSIR-Central Glass and Ceramic Research Institute, Kolkata 700032, India

\*Corresponding author's email ID: chandu\_ju@yahoo.co.in

**Table S1: Fit statistics and Structural details obtained from FullProf refinement of X-ray diffraction data and calculation**

| Sample name            |         | CCM0      | CCM1       | CCM2      |
|------------------------|---------|-----------|------------|-----------|
| Lattice Parameters (Å) | a       | a=5.5915  | a=5.5454   | a=5.5414  |
|                        | b       | b=2.89162 | b=2.8847   | b=2.8814  |
|                        | c       | c=5.91209 | c=5.9019   | c=5.9073  |
| Bond Length (Å)        | Mn-O    | 1.99      | 1.86       | 2.22      |
|                        |         | 2.25      | 2.15       | 2.35      |
|                        | Cu-O    | 1.78      | 2.00       | 1.43      |
| Bond angle (Degree)    | Mn-O-Mn | 93.1      | 102.36     | 75.73     |
|                        |         | 95.7      | 101.67     | 86.26     |
|                        | Cu-O-Mn | 122.7     | 116.49     | 146.87    |
|                        |         | 121.3     | 115.27     | 118.98    |
|                        | O-Mn-O  | 84.3 (4)  | 77.64 (4)  | 86.26 (4) |
|                        |         | 95.7 (4)  | 102.36 (4) | 93.74 (4) |

|                                       |          |           |            |            |
|---------------------------------------|----------|-----------|------------|------------|
|                                       |          | 93.1 (2)  | 101.66 (2) | 75.73 (2)  |
|                                       |          | 86.9 (2)  | 78.33(2)   | 104.27 (2) |
|                                       |          | 180 (3)   | 180 (3)    | 180 (3)    |
|                                       | O-Cu-O   | 180       | 180        | 180        |
| Lattice volume (V) ( $\text{\AA}^3$ ) |          | 92.751773 | 91.3656    | 91.2748    |
| Average Crystallite Size (D)(nm)      |          | 23.46     | 20.34      | 15.58      |
| Dislocation density ( $\delta$ )      |          | 1.8E-3    | 2.4E-3     | 4.1E-3     |
| Microstrain ( $\epsilon$ )            |          | 0.06      | 0.09       | 0.25       |
| Reliability factors                   | $\chi^2$ | 3.4       | 3.5        | 3.1        |
|                                       | $R_p$    | 6.02      | 2.96       | 2.16       |
|                                       | $R_{wp}$ | 11.2      | 4.41       | 3.41       |

**Table S2: Structural details obtained from TEM SAED pattern.**

| Sample name                                        |   | CCM0   | CCM1   | CCM2   |
|----------------------------------------------------|---|--------|--------|--------|
| $d_{hkl}$ ( $\text{\AA}$ ) corresponding to (11-1) |   | 2.4298 | 2.4149 | 2.3895 |
| $d_{hkl}$ ( $\text{\AA}$ ) corresponding to (200)  |   | 2.6846 | 2.6511 | 2.6420 |
| $d_{hkl}$ ( $\text{\AA}$ ) corresponding to (11-3) |   | 1.5564 | 1.5439 | 1.5295 |
| Lattice Parameters ( $\text{\AA}$ )                | a | 5.3692 | 5.3022 | 5.2840 |
|                                                    | b | 3.0971 | 3.0875 | 3.0459 |
|                                                    | c | 5.7327 | 5.6792 | 5.6309 |
| Microstrain ( $\epsilon$ )                         |   | 0.0369 | 0.0487 | 0.0522 |

### Characterization of GQD sample:

The UV-Vis absorption spectra (Figure S1) of GQD displayed two peaks at 249 nm and 307 nm, which can be attributed to the  $\pi$ - $\pi^*$  transition of the aromatic  $sp^2$  domain having bandgap values of 3.27 and 3.72 eV. The GQD Excitation-dependent photoluminescence (PL)

behaviour is a characteristic of fluorescent carbon materials. The GQD samples, when excited at 371 nm, displayed PL peaks at 469 and 525 nm, which are in good agreement with the literature. Figure S1(d) represents the Raman spectra of as-synthesised GQD samples, which feature two prominent peaks at 1441 and 1651  $\text{cm}^{-1}$  corresponding to the D and G bands. These characteristics verify the successful synthesis of GQD [28-29, 35].

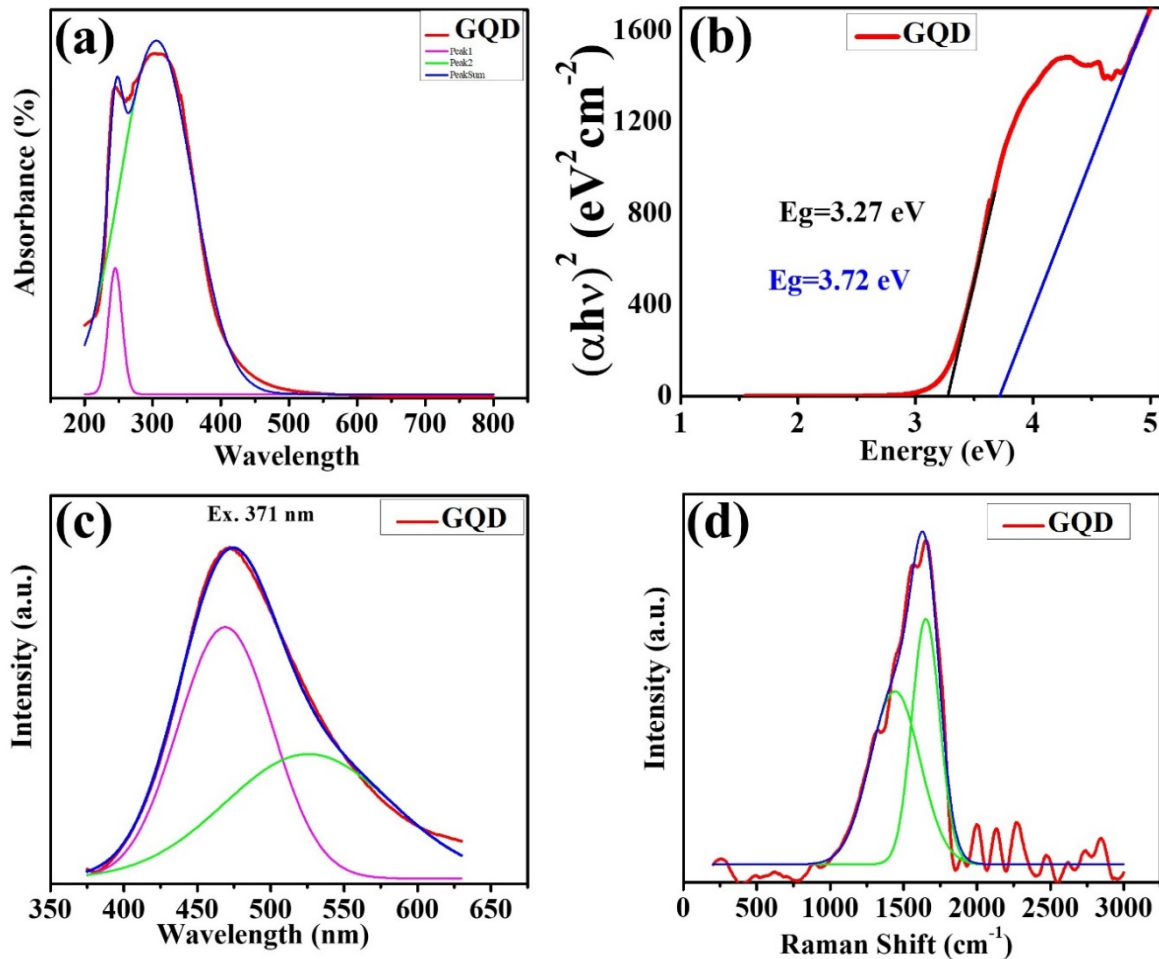

Figure S1: (a) UV-Vis. absorption spectra (b), corresponding band gaps (c) Photoluminescence spectra and (d) Raman spectra of the GQD sample.

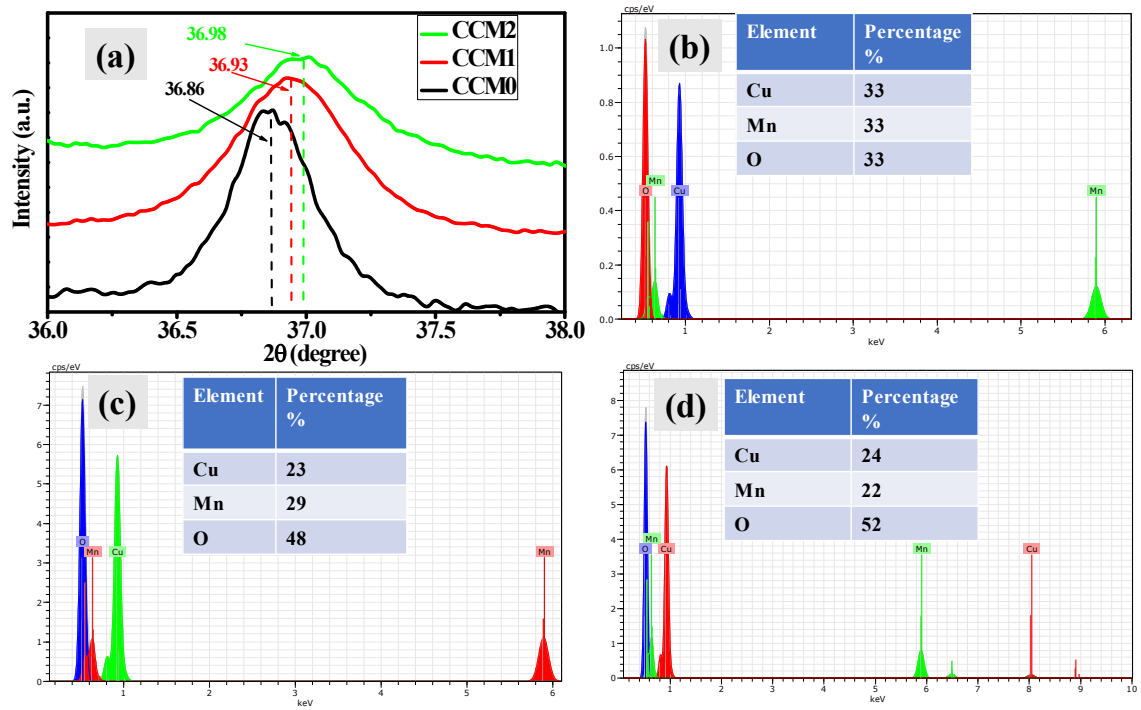

Figure S2: (a) XRD peak shifts and EDS plots of (b) CCM0, (c) CCM1, and (d) CCM2

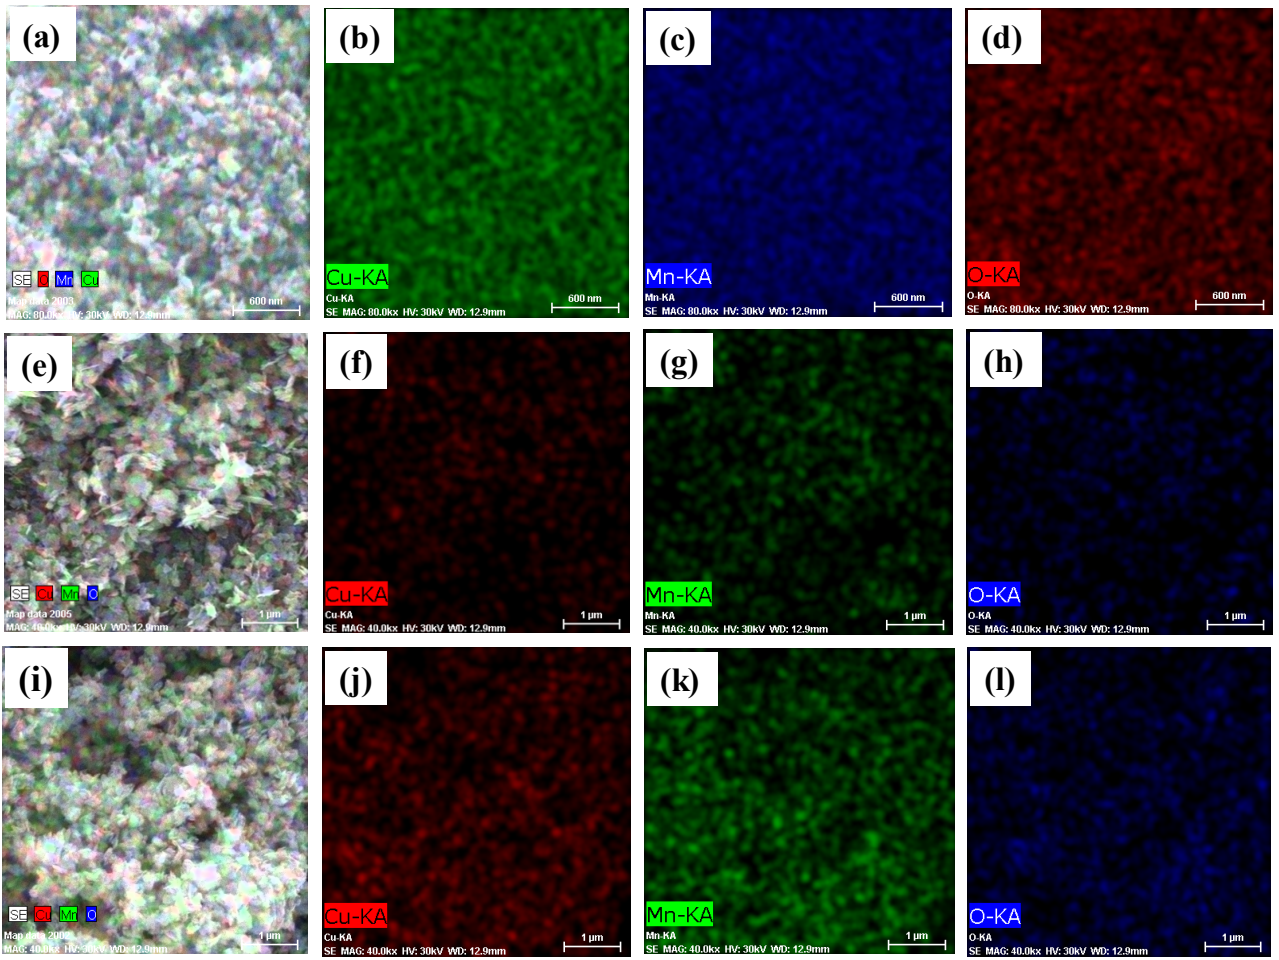

Figure S3: Elemental mapping of (a)-(d) CCM0, (e)-(h) CCM1 and (i)-(l) CCM2 samples.

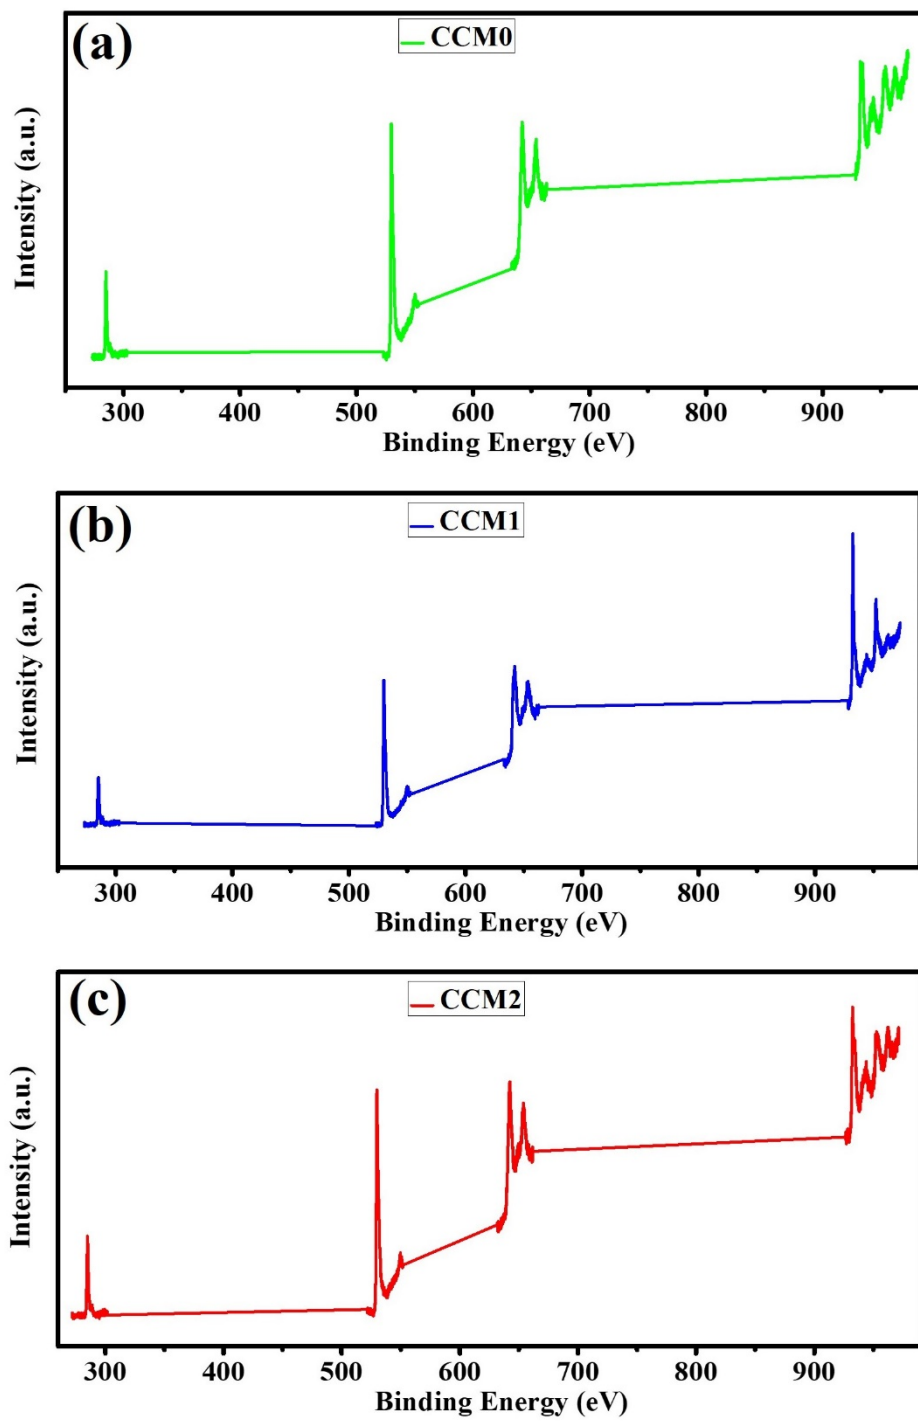

Figure S4: XPS Survey spectra

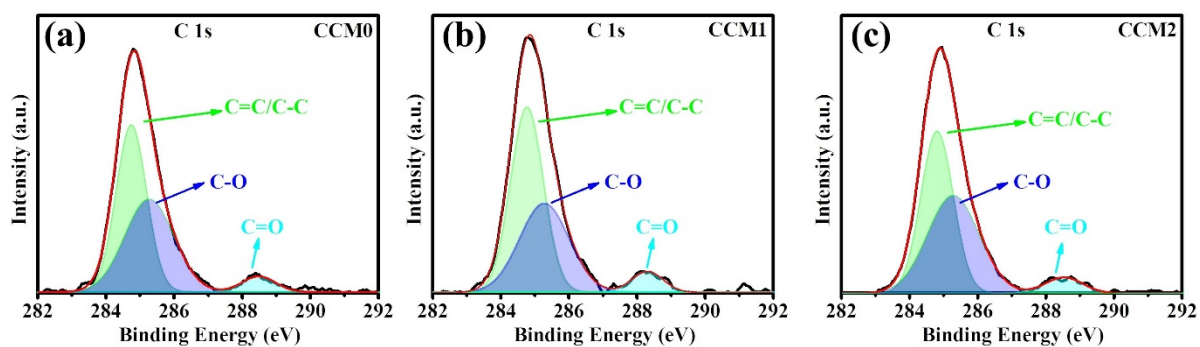

Figure S5: XPS spectra of C1s

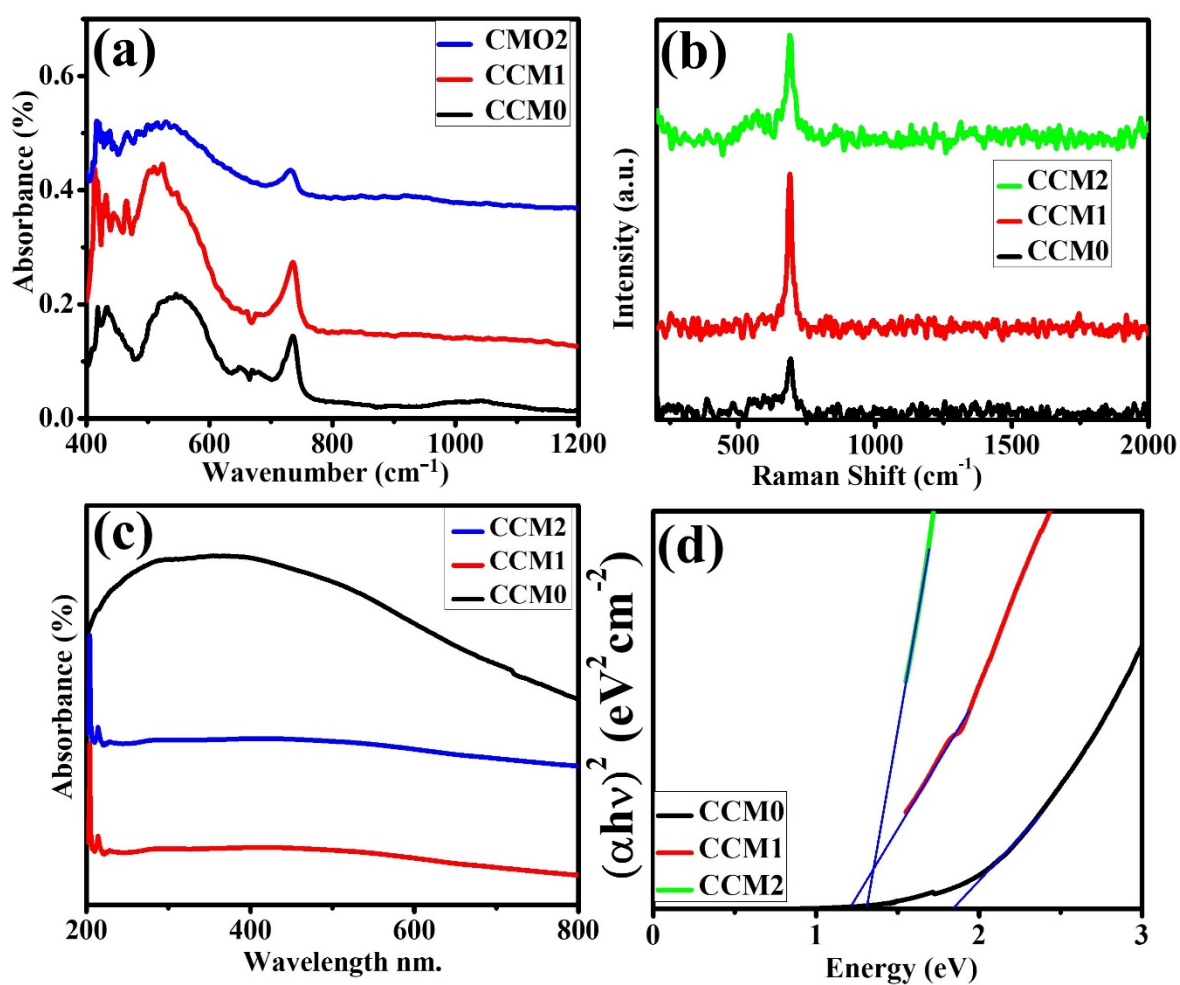

Figure S6: (a) FTIR spectra (400-1200  $\text{cm}^{-1}$ ), (b) Raman spectra from 250-2000  $\text{cm}^{-1}$  (c) UV-Vis. absorption spectra (d) corresponding bandgap  $E_g$

## Electrochemical analysis

Coulombic efficiency ( $\eta\%$ ) is defined in this context as

$$\eta\% = \frac{t_{discharge}}{t_{charge}} \times 100 \quad \dots SE2$$

where  $t_{charge}$  is the charging time and  $t_{discharge}$  is the discharging time.

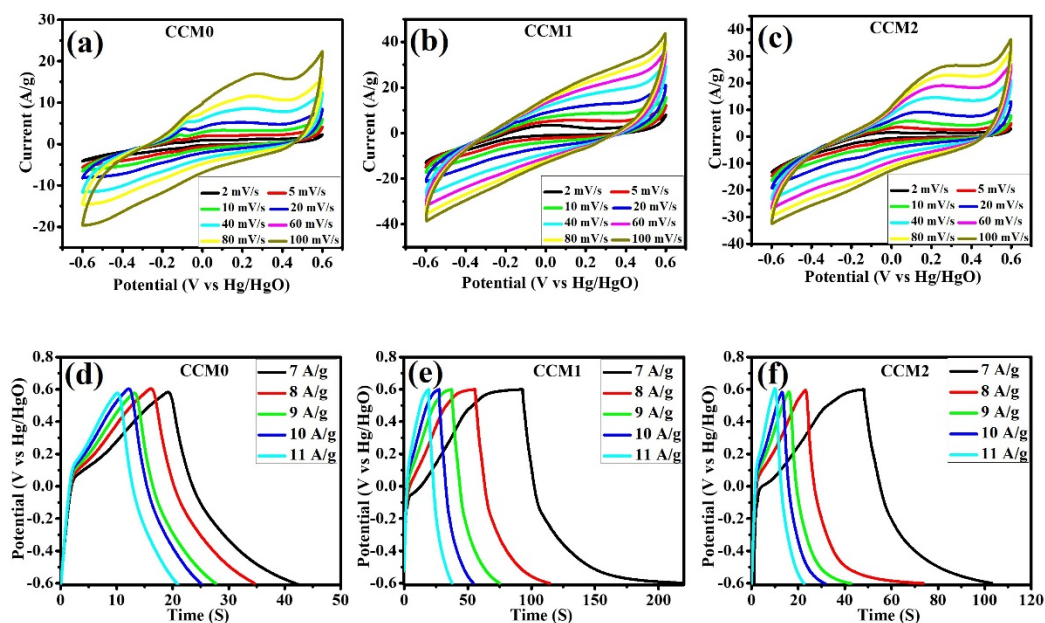

Figure S7: CV plots of (a) CCM0, (b) CCM1, and (c) CCM2 for different scan rates and GCD plots of (d) CCM0, (e) CCM1 and (f) CCM2 at different current densities.

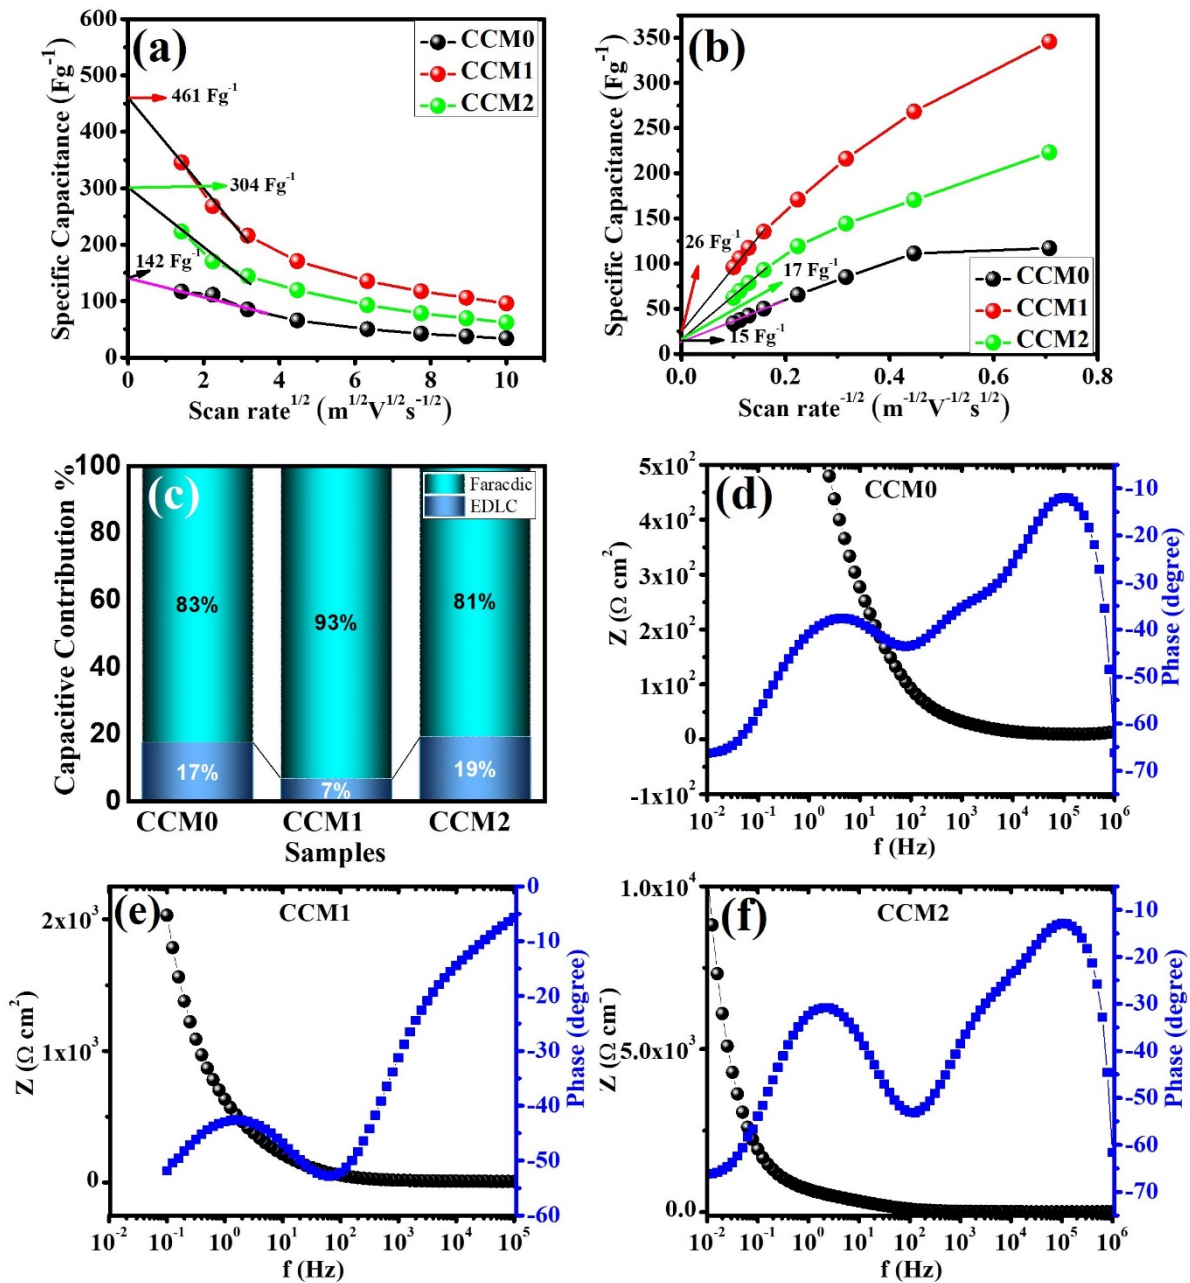

Figure S8: (a)  $C_m$  versus  $v^{1/2}$  (b)  $C_m$  versus  $v^{-1/2}$  plots (c) capacitance contribution percentage of CCM0, CCM1 and CCM2 and bode plot of (d) CCM0, (e) CCM1 and (f) CCM2

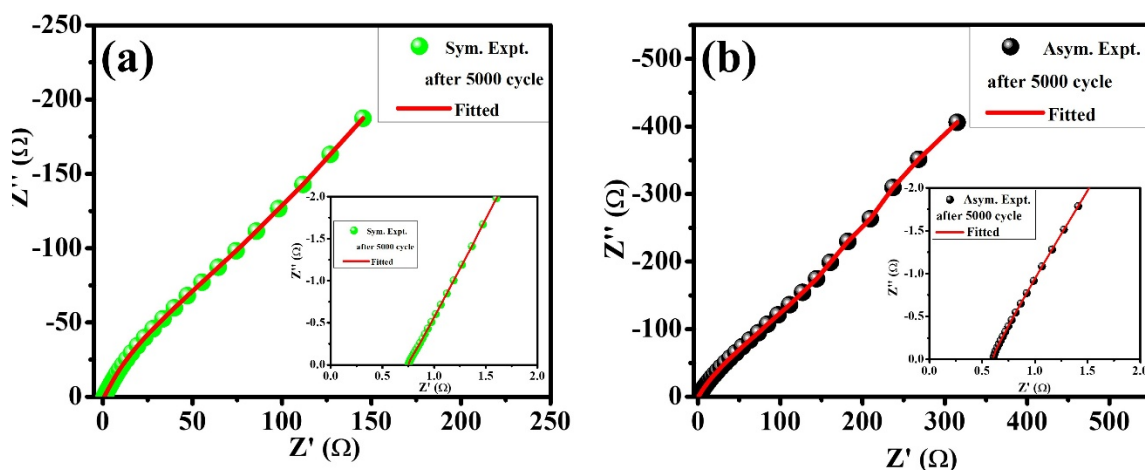

Figure S9: EIS plots after 5000 cycles of (a) symmetric and (b) asymmetric coin-cell supercapacitor

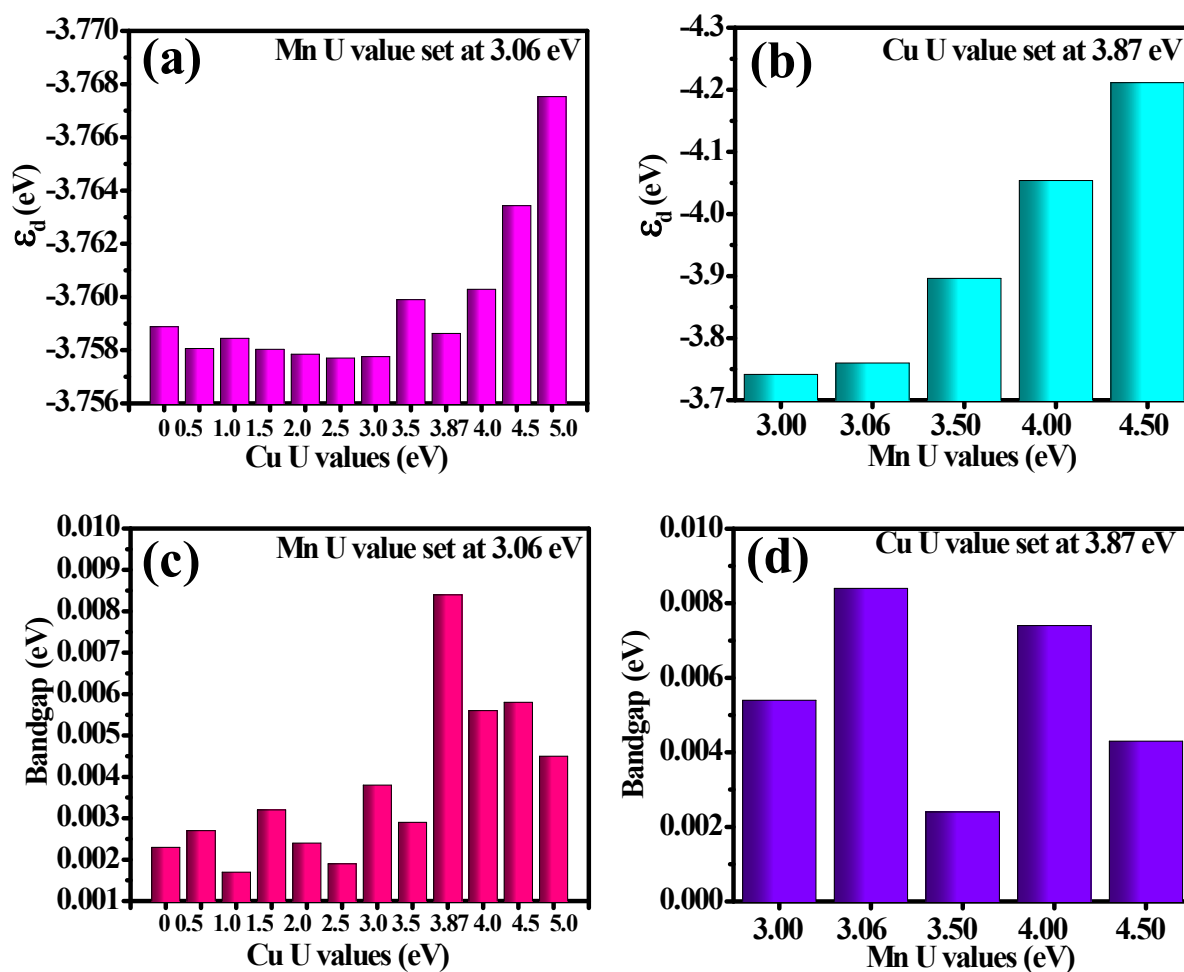

Figure S10: Variation of d-band centre position with (a) Cu U value and (b) Mn U value, and Variation of bandgap value with (a) Cu U value and (b) Mn U value.

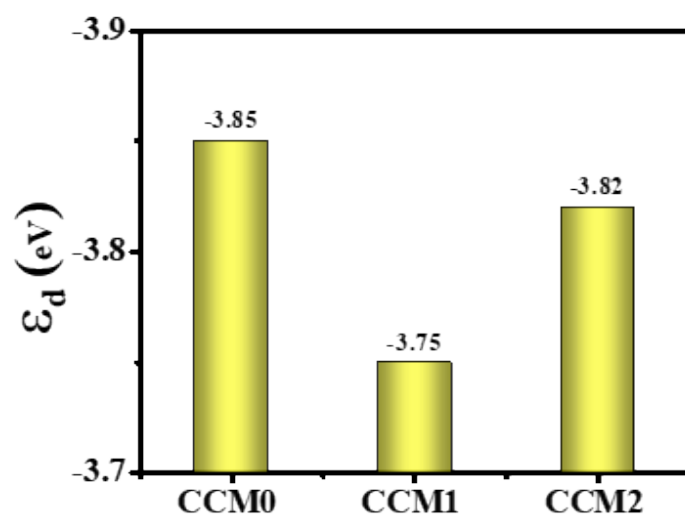

Figure S11: variation of d-band centre position

Table S3. Comparative analysis of the specific capacitance of the CCM1 electrode with other CuMnO<sub>2</sub>-based electrodes, measured in 3 electrode configurations.

| Electrode                         | Electrode material deposited on | Electrolyte                         | Capacitance (F/g)                                | Reference |
|-----------------------------------|---------------------------------|-------------------------------------|--------------------------------------------------|-----------|
| CuMnO <sub>2</sub>                | Glassy carbon                   | 1M Na <sub>2</sub> SO <sub>4</sub>  | 130.72 F/g at 0.2 A/g                            | S1        |
| CuMnO <sub>2</sub>                | Nickel foam                     | PVA-KOH                             | 765 F/g at 5 A/g                                 | S2        |
| CuMnO <sub>2</sub> -rGO           | Nickel Foam                     | 2M KOH                              | 1727.15 F/g at 3A/g                              | S3        |
| CuMnO <sub>2</sub> /GQD           | Nickel Foam                     | 3M KOH                              | 520.2 at 1A/g                                    | S4        |
| PANI@CuMnO <sub>2</sub> composite | Carbon cloth                    | 0.1M H <sub>2</sub> SO <sub>4</sub> | 355.62 mF/cm <sup>2</sup> at 1mA/cm <sup>2</sup> | S5        |
| CuMnO <sub>2</sub> -GQD           | Glassy carbon                   | 3M KOH                              | 771 F/g                                          | This work |

Table S4. Comparative analysis of power and energy density of the CCM1 electrode with other Cu-based delafossites in 3 electrode configuration.

| Electrode                | Energy and Power density             | Reference |
|--------------------------|--------------------------------------|-----------|
| CuMnO <sub>2</sub>       | 14.71Wh/Kg at 90 W/kg                | S1        |
| CuMnO <sub>2</sub> /PANI | 130 W/kg at 773 W/kg                 | S6        |
| CuMnO <sub>2</sub>       | 15.5 Wh/Kg at 800 W Kg <sup>-1</sup> | S7        |
| CuFeO <sub>2</sub>       | 30.55 Wh/kg and ~ 236.52 W/kg        | S8        |
| CuFeO <sub>2</sub>       | 66.56 Wh/kg                          | S9        |
| CuMnO <sub>2</sub> -GQD  | 154.35 Wh/Kg at 4200 W/Kg            | This work |

Table S5. Fit statistics and comparative analysis of equivalent circuit parameters of symmetric and asymmetric coin cell supercapacitor

| System                       | Equivalent circuit | R <sub>s</sub> (Ω) | R <sub>ct</sub> (Ω) |
|------------------------------|--------------------|--------------------|---------------------|
| Symmetric Fresh              |                    | 0.511              | 43.03               |
| Symmetric after 5000 cycles  |                    | 0.745              | 59.37               |
| Asymmetric Fresh             |                    | 0.435              | 32.32               |
| Asymmetric after 5000 cycles |                    | 0.568              | 103.6               |

Table S6. Comparative analysis of CCM1-based symmetric and asymmetric coin-cell supercapacitor with other symmetric and asymmetric devices

| Material | System | Electrolyte | Capacitance (F/g) | Current density (A/g) | Energy density (Wh/kg) | Power density (W/kg) | Reference |
|----------|--------|-------------|-------------------|-----------------------|------------------------|----------------------|-----------|
|----------|--------|-------------|-------------------|-----------------------|------------------------|----------------------|-----------|

|                                                         |                      |                                            |                         |                         |       |       |           |
|---------------------------------------------------------|----------------------|--------------------------------------------|-------------------------|-------------------------|-------|-------|-----------|
| CuMnO <sub>2</sub>                                      | Symmetric Coin cell  | Aqueous 1M Na <sub>2</sub> SO <sub>4</sub> | 71                      | 0.35                    | 14.2  | 333.3 | S1        |
| Antimony trioxide (Sb <sub>2</sub> O <sub>3</sub> )     | Symmetric Coin cell  | Aqueous 6M KOH                             | 354.4                   | 1                       | 9.21  | 300   | S10       |
| PICACIFF-activated carbon                               | Symmetric Coin cell  | Ethylene glycol-based aqueous electrolyte  | 30                      | 100 mA/g                | 9.4   | 230   | S11       |
| N doped carbon                                          | Symmetric            | Aqueous 6M KOH                             | 359.9                   | 1                       | 18.9  | 500   | S12       |
| Titaniumoxynitride (TiON) nanorods                      | Symmetric Coin cell  | 1MLiClO <sub>4</sub>                       | 1930 mF/g <sup>-1</sup> | 250 mA/g <sup>-1</sup>  | 6.7   | 180   | S13       |
| rGO/AuNPs                                               | Symmetric Coin cell  | Aqueous 6M KOH                             | 56.09                   | -----                   | 7.79  | 2512  | S14       |
| BiMnO <sub>3</sub> //A C                                | Asymmetric           | Aqueous 3M KOH                             | 108 F/cm <sup>2</sup>   | 0.25 mAcm <sup>-2</sup> | 14.4  | 50    | S15       |
| ZnNi <sub>2</sub> O <sub>4</sub> /W S <sub>2</sub> //AC | Asymmetric           | NaOH                                       | 171.3                   | -----                   | 61    | 1236  | S16       |
| CuMnO <sub>2</sub> /GQD                                 | Symmetric Coin cell  | Aqueous 3M KOH                             | 145                     | 1                       | 34.2  | 650   | This work |
| CuMnO <sub>2</sub> /GQD//AC                             | Asymmetric Coin cell | Aqueous 3M KOH                             | 147                     | 2                       | 40.01 | 1398  | This work |

Reference:

- (S1) R. Kabir, R. Begum, K. R. Sahoo, S. Goswami, S. N. Das, M. R. Karim, D. Bhattacharya, S. Seth, C. K. Ghosh, Nanoarchitectonics of Interstitial Oxygen and Jahn–Teller Distortion to Enhance Electrochemical Performance of CuMnO<sub>2</sub>: Symmetric Coin-Cell, *Appl. Phys. A*, 2025, **131**(1), 1–15, DOI: [10.1007/s00339-024-08116-z](https://doi.org/10.1007/s00339-024-08116-z).
- (S2) S. Fu, L. Li, Y. Jing, Y. Zhang, X. Wang, S. Fang, J. Wang, G. Li, Crystal Growth of Bimetallic Oxides CuMnO<sub>2</sub> With Tailored Valence States for Optimum Electrochemical Energy Storage, *Cryst. Growth Des.*, 2018, **18**(10), 6107–6116, DOI: [10.1021/acs.cgd.8b00988](https://doi.org/10.1021/acs.cgd.8b00988).
- (S3) F. Bahmani, S. H. Kazemi, Y. Wu, L. Liu, Y. Xu, Y. Lei, CuMnO<sub>2</sub>–Reduced Graphene Oxide Nanocomposite as A Free-Standing Electrode for High-Performance Supercapacitors, *Chem. Eng. J.*, 2019, **375**, 121966, DOI: [10.1016/j.cej.2019.121966](https://doi.org/10.1016/j.cej.2019.121966).
- (S4) M. Ashourdan, A. Semnani, F. Hasanpour, S. E. Moosavifard, Synthesis of CuMnO<sub>2</sub>/Graphene Quantum Dot Nanocomposites as Novel Electrode Materials for High Performance Supercapacitors, *J. Energy Storage*, 2021, **36**, 102449, DOI: [10.1016/j.est.2021.102449](https://doi.org/10.1016/j.est.2021.102449).
- (S5) M. S. Chaudhary, D. Seth, S. Waris, S. Hasan, S. Sultana, M. A. Haider, M. Agarwal, M. Z. Khan, Hydrothermally Synthesized PANI-Decorated CuMnO<sub>2</sub> Nanostructured Electrode: Powering Flexible Solid-State Supercapacitors for Wearable and Portable Electronics, *ACS Appl. Energy Mater.*, 2024, **8**(1), 245–258, DOI: [10.1021/acsaem.4c02311](https://doi.org/10.1021/acsaem.4c02311).
- (S6) M. Arif, A. Bibi, I. Safra, A. Kumar, J. Makasana, S. Ballal, R. S. K. Sharma, P. K. Pathak and R. R. Chaudhary, Preparation of delafossite CuMnO<sub>2</sub> and polyaniline nanohybrid electrode for asymmetric supercapacitor, *J. Inorg. Organomet. Polym. Mater.*, 2025, **35**(8), 6643–6658. DOI: [10.1007/s10904-025-03684-w](https://doi.org/10.1007/s10904-025-03684-w)
- (S7) K. S. Modi, P. B. Patel, D. Patel, J. Patel, V. Solanki and M. H. Patel, Electrochemical study of crednerite CuMnO<sub>2</sub> for symmetric supercapacitor applications, *Phys. Chem. Chem. Phys.*, 2026 DOI: [10.1039/D5CP04565G](https://doi.org/10.1039/D5CP04565G)
- (S8) A. Dey, S. Goswami, S. N. Das, D. Bhattacharya and C. K. Ghosh, Cu<sup>2+</sup> at the surface/sub-surface region of CuFeO<sub>2</sub> rhombohedral nanostructures facilitates specific capacitance (~611 F g<sup>-1</sup>): an understanding of the solvation energy dependent charge transfer mechanism, *Physica B: Condens. Matter*, 2023, **667**, 415207. DOI: [10.1016/j.physb.2023.415207](https://doi.org/10.1016/j.physb.2023.415207)
- (S9) M. Danish, A. Hussain, S. R. Shafqat, Z. A. Sandhu, K. M. Batoor, M. F. Ijaz, A. H. Bhalli and M. Fiaz, Multifunctional CuFeO<sub>2</sub> nanocomposites: 3D series-metal-based materials for hydrogen evolution reaction and supercapacitor applications, *Ceram. Int.*, 2025, **51**(18), 24989–24998. DOI: [10.1016/j.ceramint.2025.03.180](https://doi.org/10.1016/j.ceramint.2025.03.180)
- (S10) U. Şahintürk, B. Üstün, H. Aydın, S. N. Koç, Ü. Kurtan, Coin Cell Constructed Symmetric Supercapacitor Based on Binder-Free Antimony Trioxide (Sb<sub>2</sub>O<sub>3</sub>) In Heteroatom Doped Carbon Nanofibers, *J. Power Sources*, 2024, **613**, 234882, DOI: [10.1016/j.jpowsour.2024.234882](https://doi.org/10.1016/j.jpowsour.2024.234882).

(S11) C. Ramasamy, J. P. Del Val, M. Anderson, An Analysis of Ethylene Glycol–Aqueous Based Electrolyte System for Supercapacitor Applications, *J. Power Sources*, 2014, **248**, 370–377, DOI: [10.1016/j.jpowsour.2013.09.078](https://doi.org/10.1016/j.jpowsour.2013.09.078).

(S12) T. Ren, K. Wang, X. Lian, C. Xu, H. Niu, Nitrogen-Doped Carbon Nanotubes on Carbon Nanofibers for Applications as Supercapacitors with Long Lifetimes, *ACS Appl. Nano Mater.*, 2025, **8**, 11359–11369, DOI: [10.1021/acsnm.5c01120](https://doi.org/10.1021/acsnm.5c01120).

(S13) J. S. Samdani, T. H. Kang, B. J. Lee, Y. H. Jang, J. S. Yu, S. Shanmugam, Heterostructured Titanium Oxynitride–Manganese Cobalt Oxide Nanorods as High-Performance Electrode Materials for Supercapacitor Devices, *ACS Appl. Mater. Interfaces*, 2020, **12**, 54524–54536, DOI: [10.1021/acami.0c13803](https://doi.org/10.1021/acami.0c13803).

(S14) L. Vivas, D. P. Singh, A Highly Efficient Graphene–Gold Based Green Supercapacitor Coin Cell Device for Energy Storage, *Front. Energy Res.*, 2022, **9**, 794604, DOI: [10.3389/fenrg.2021.794604](https://doi.org/10.3389/fenrg.2021.794604).

(S15) A. M. Teli, T. S. Bhat, S. A. Beknalkar, S. M. Mane, L. S. Chaudhary, D. S. Patil, S. A. Pawar, H. Efstathiadis, J. C. Shin, Bismuth Manganese Oxide-Based Electrodes for Asymmetric Coin Cell Supercapacitor, *Chem. Eng. J.*, 2022, **430**, 133138, DOI: [10.1016/j.cej.2021.133138](https://doi.org/10.1016/j.cej.2021.133138).

(S16) M. Sharma, M. Pershaanaa, A. K. Singh, R. Kasi, R. T. Subramaniam, P. Deb, ZnNi<sub>2</sub>O<sub>4</sub>/WS<sub>2</sub> Nanoflake-Based Electrodes for Quasi-Solid-State Asymmetric Supercapacitors, *ACS Appl. Nano Mater.*, 2024, **7**, 23592–23603, DOI: [10.1021/acsnm.4c03750](https://doi.org/10.1021/acsnm.4c03750).
